# Supplementary material
Source: PubMed Central journal article supplement (PMC6879269)
Supplement: AAC.00994-19-s0001.pdf [file AAC.00994-19-s0001.pdf]

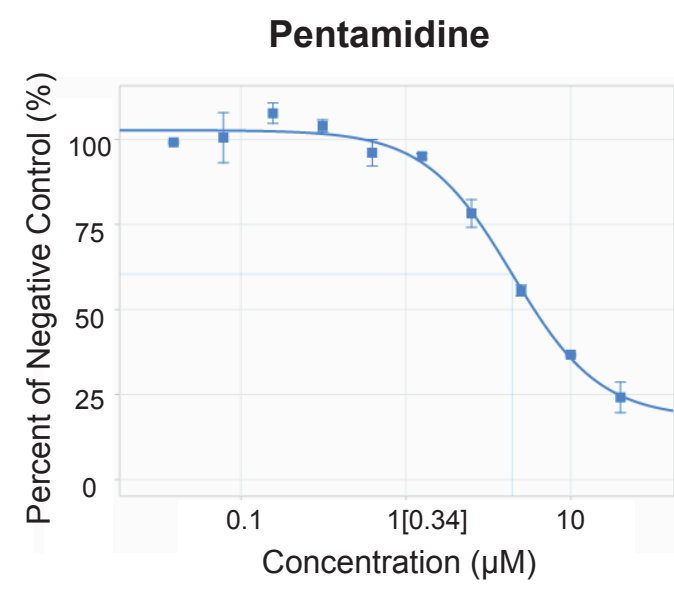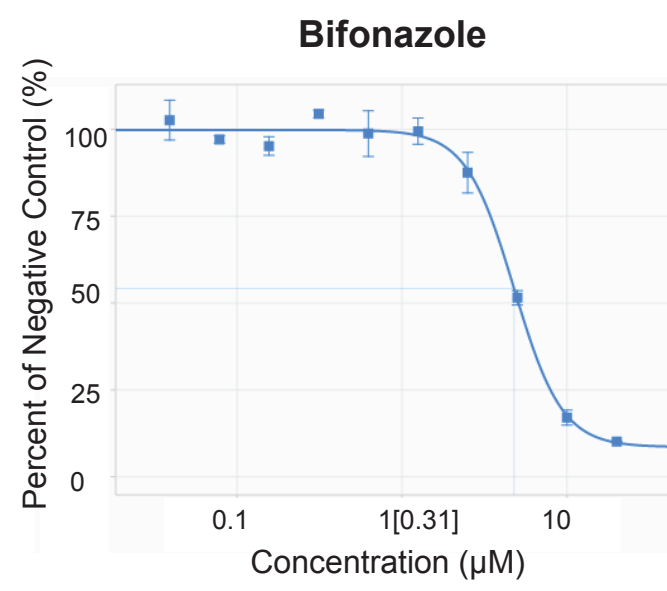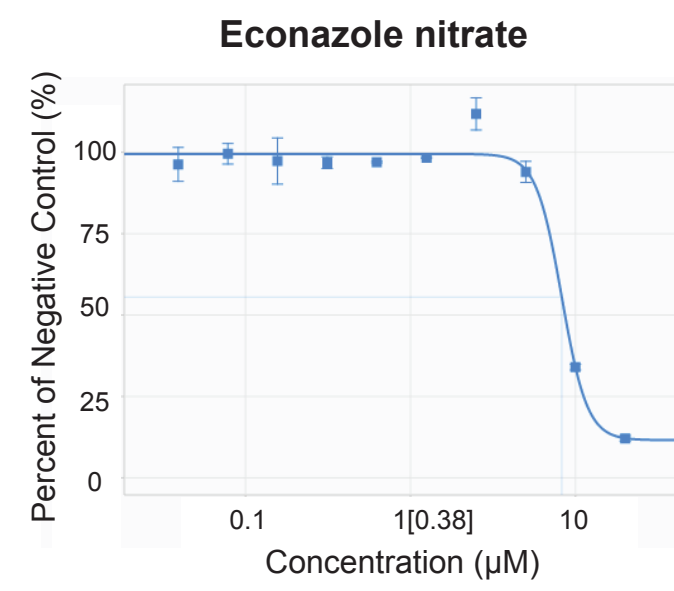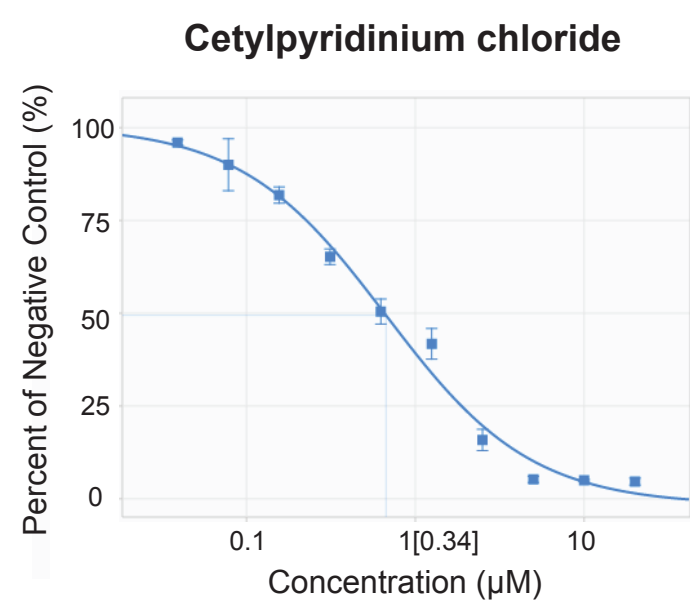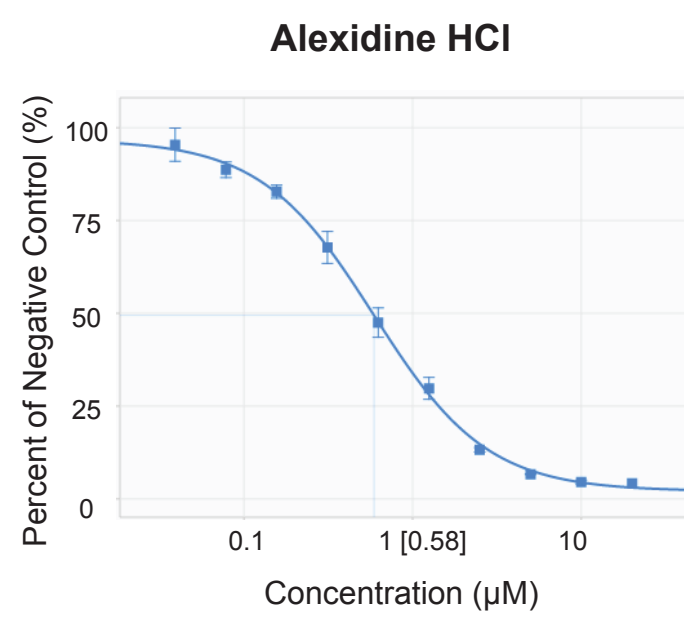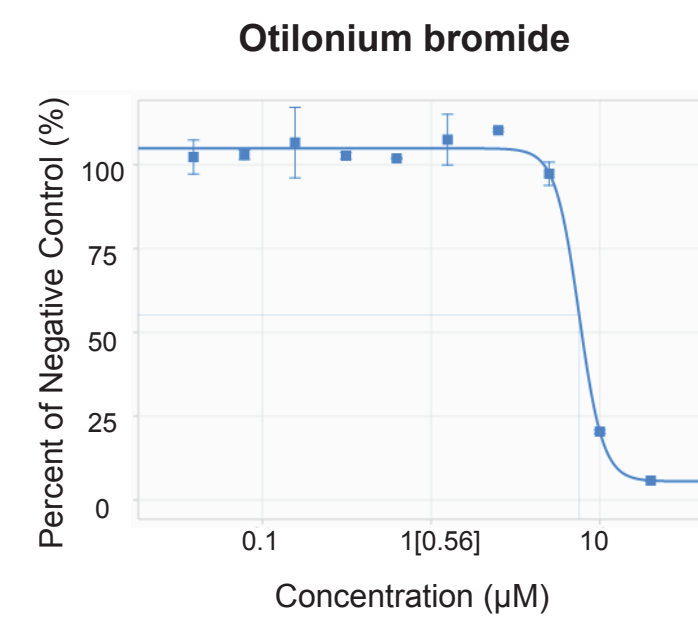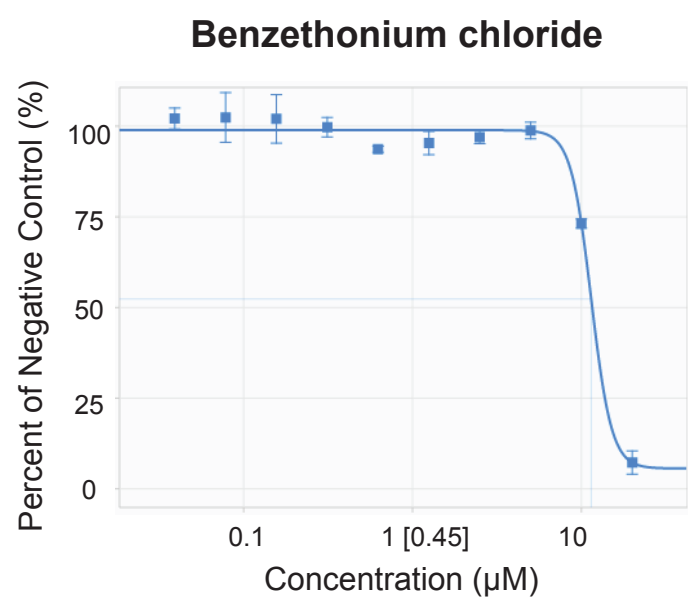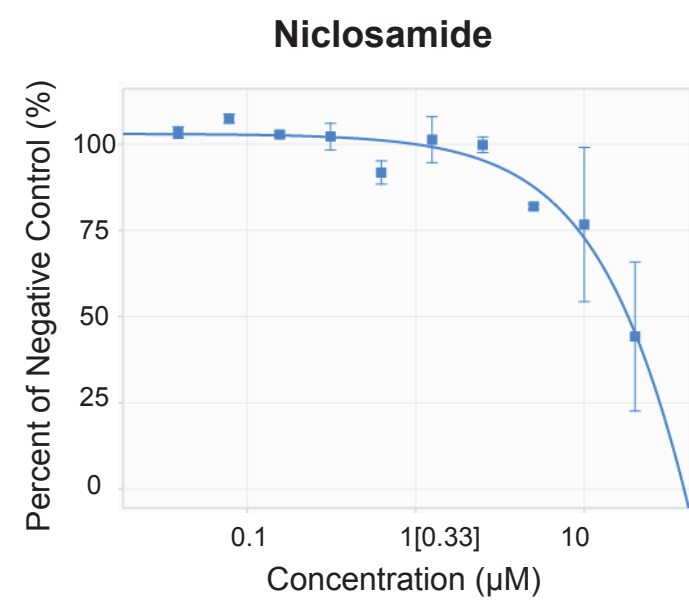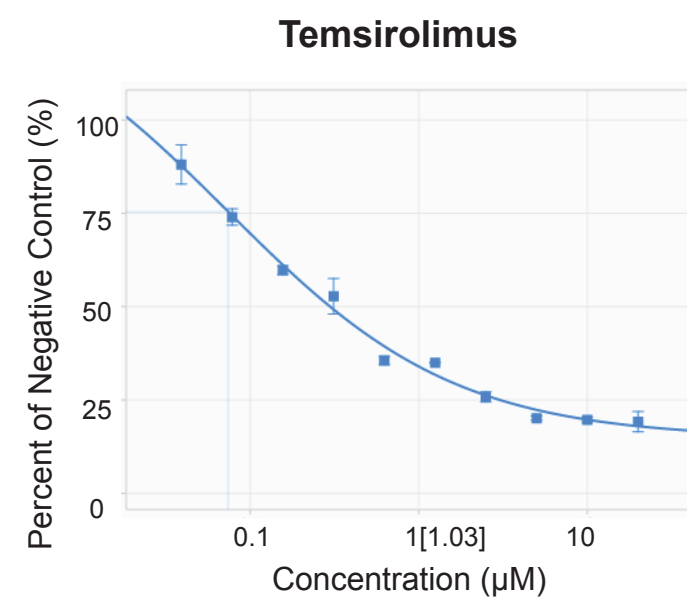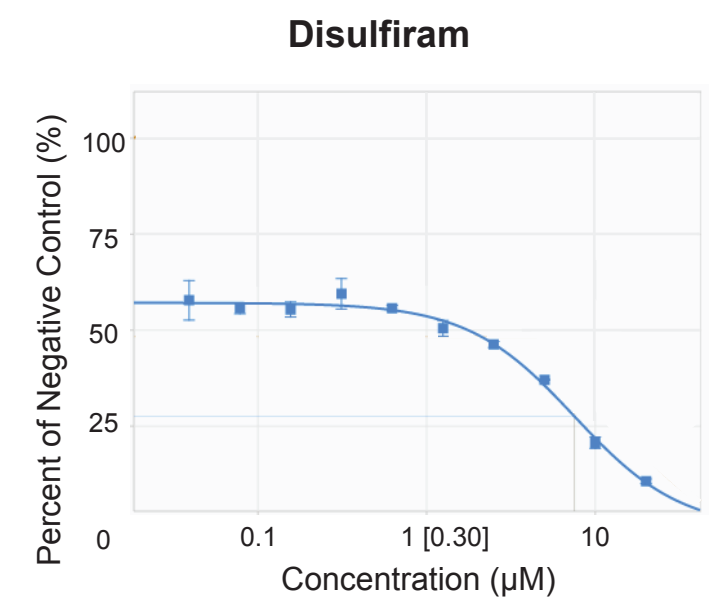

Figure S1.  $\text{IC}_{50}$  plots of germination inhibiting drugs based on luciferase signals. Equivalent values in  $\mu\text{g}/\text{mL}$  are given in brackets for each drug at 1  $\mu\text{M}$ .

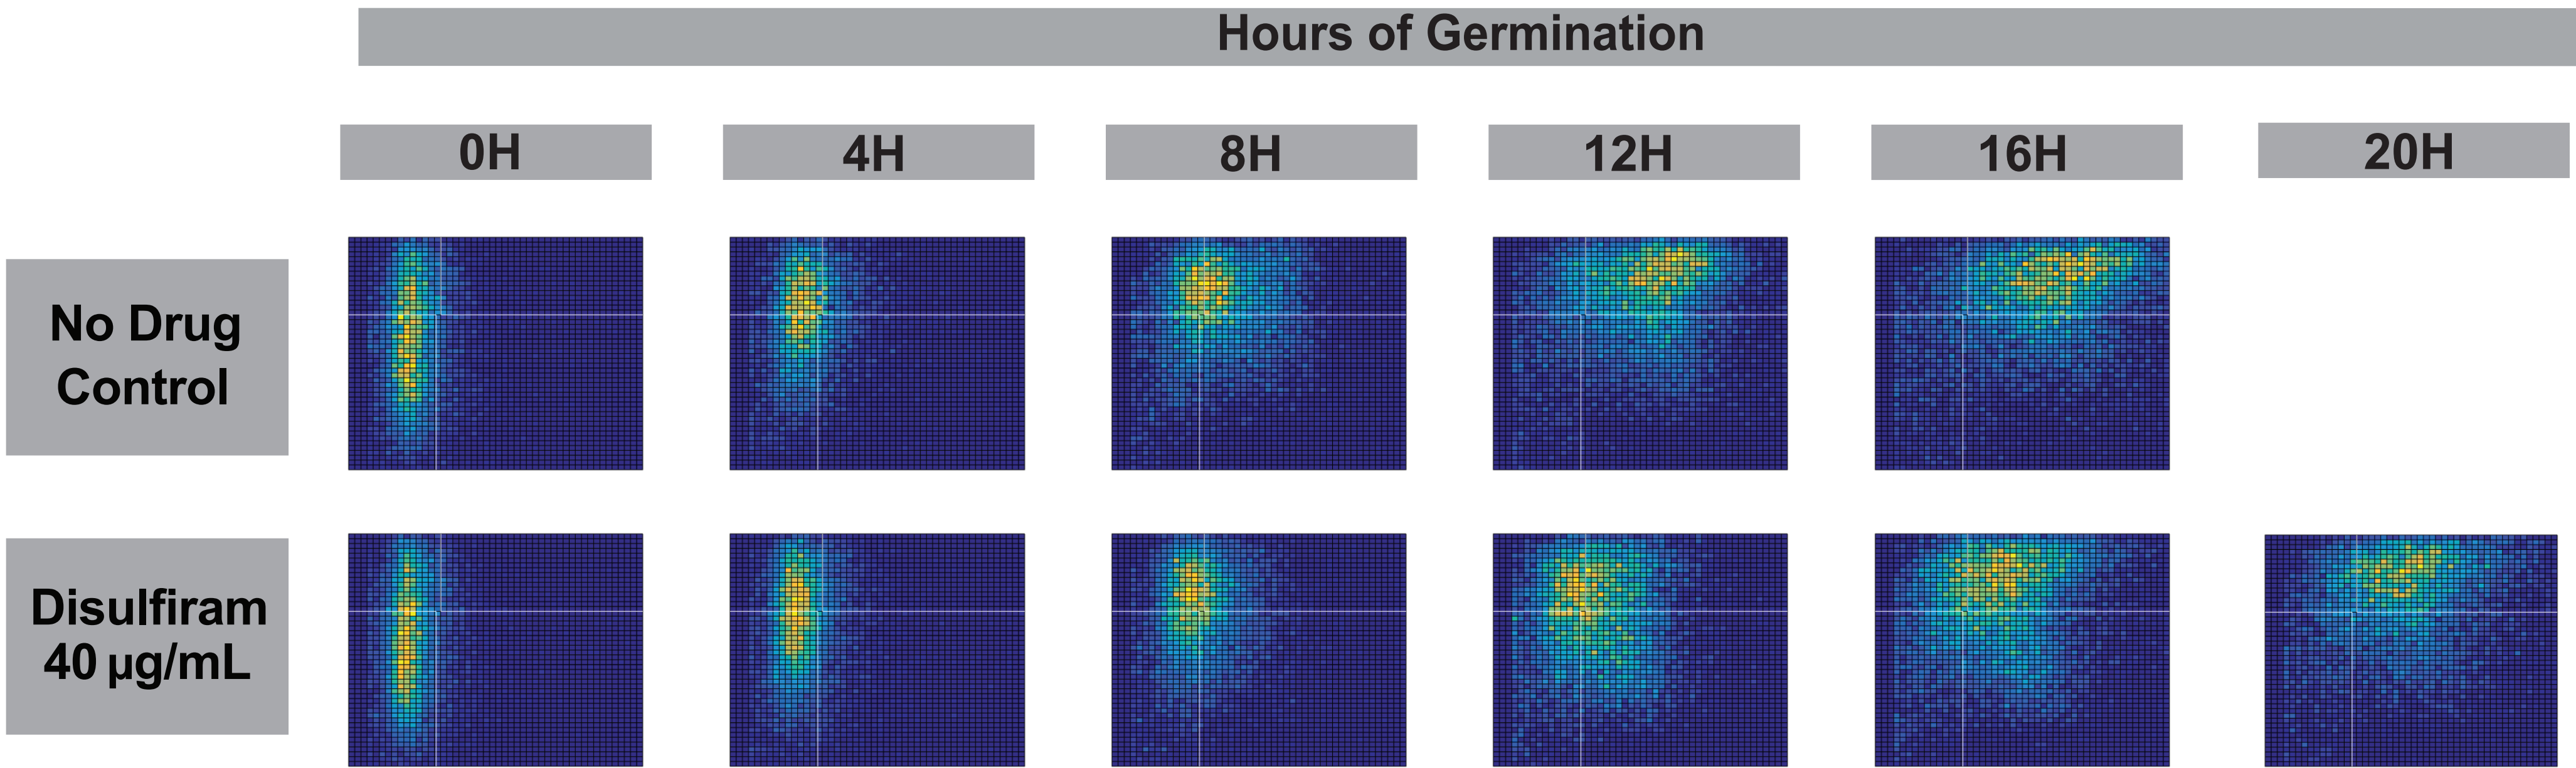

**Figure S2. Disulfiram causes a pause in spore germination at the ~8 hour time point.** Germination profiles of spores (JEC20xJEC21) exposed to Disulfiram at 0 or 40µg/mL at 0, 4, 8,12,16 and 20 hours of germination. Each germination profile has aspect ratio going from 0.4 to 1 on the y-axis and area going from 0 to 25 µm<sup>2</sup> on the x-axis.
